# Supplementary material
Source: publisher figshare collection journal article supplement (https://acs.figshare.com/ndownloader/files/9938320)
Supplement: Supplementary file 1 [file 9938320]

# Supporting Information for

## Unusual Pressure Response of Vibrational Modes in Anisotropic TaS<sub>3</sub>

Kedi Wu,<sup>†</sup> Bin Chen,<sup>†</sup> Hui Cai,<sup>†</sup> Mark Blei,<sup>†</sup> Juliana Bennett,<sup>†</sup> Shengxue Yang,<sup>‡</sup> David Wright,<sup>§</sup>  
Yuxia Shen,<sup>†</sup> and Sefaattin Tongay<sup>\*,†</sup>

<sup>†</sup> School for Engineering of Matter, Transport and Energy, Arizona State University, Tempe, Arizona  
85287, United States

<sup>‡</sup> School of Materials Science and Engineering, Beihang University, Beijing 100191, People's Republic of  
China

<sup>§</sup> LeRoy Eyring Center for Solid State Science, Arizona State University, Tempe, Arizona 85287, United  
States

**Corresponding Author:** Sefaattin Tongay

E-mail: sefaattin.tongay@asu.edu

## Supporting Information

**Figure S1** Two potential unit cell structures of orthorhombic-TaS<sub>3</sub> (*o*-TaS<sub>3</sub>).

**Figure S2** X-ray diffraction (XRD) pattern of *o*-TaS<sub>3</sub>.

**Figure S3** Schematic diagram for S<sub>||</sub>, S<sub>⊥</sub>, A<sub>g</sub> and A<sub>g</sub><sup>s-s</sup> modes.

**Figure S4** Angle-resolved Raman spectroscopy (polar plots) for additional the Raman peaks of *o*-TaS<sub>3</sub> under excitation wavelength of  $\lambda = 532$  nm.

**Figure S5** Comparison between the angle-resolved Raman response (polar plots) of *o*-TaS<sub>3</sub> under three different excitation wavelengths:  $\lambda = 488$  nm, 532 nm, 633 nm.

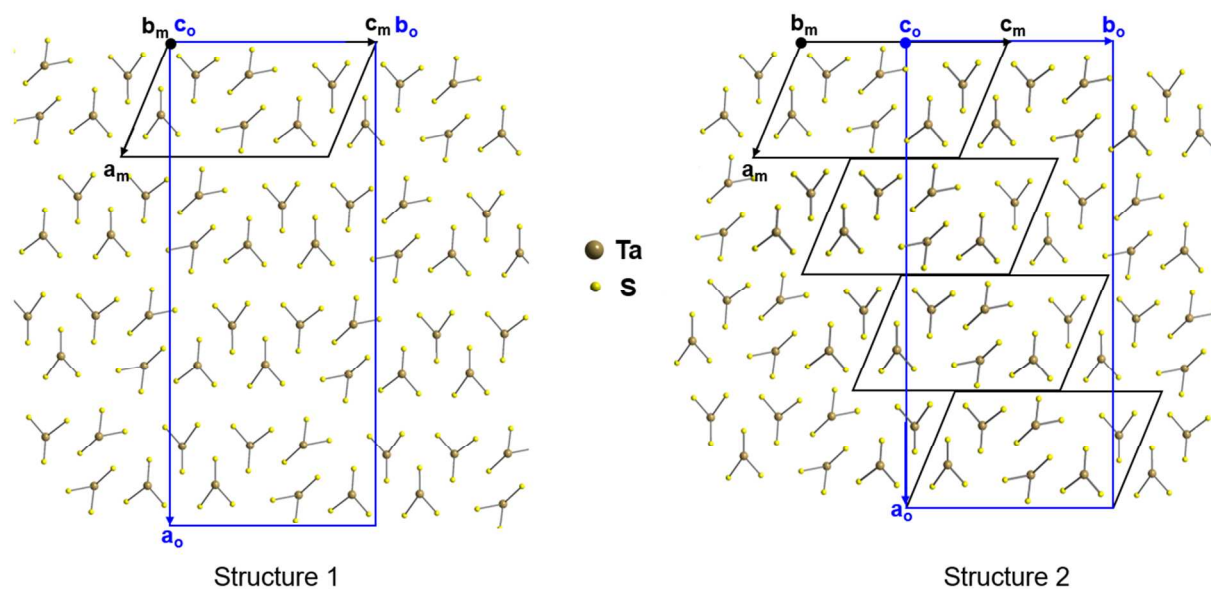

**Figure S1** Two potential unit cell structures of orthorhombic-TaS<sub>3</sub> (blue line) described as stacking four slabs of *m*-TaS<sub>3</sub> unit cells (black line).

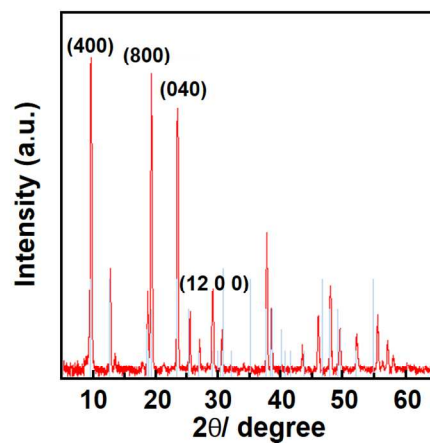

**Figure S2** X-ray diffraction (XRD) pattern of o-TaS<sub>3</sub>.

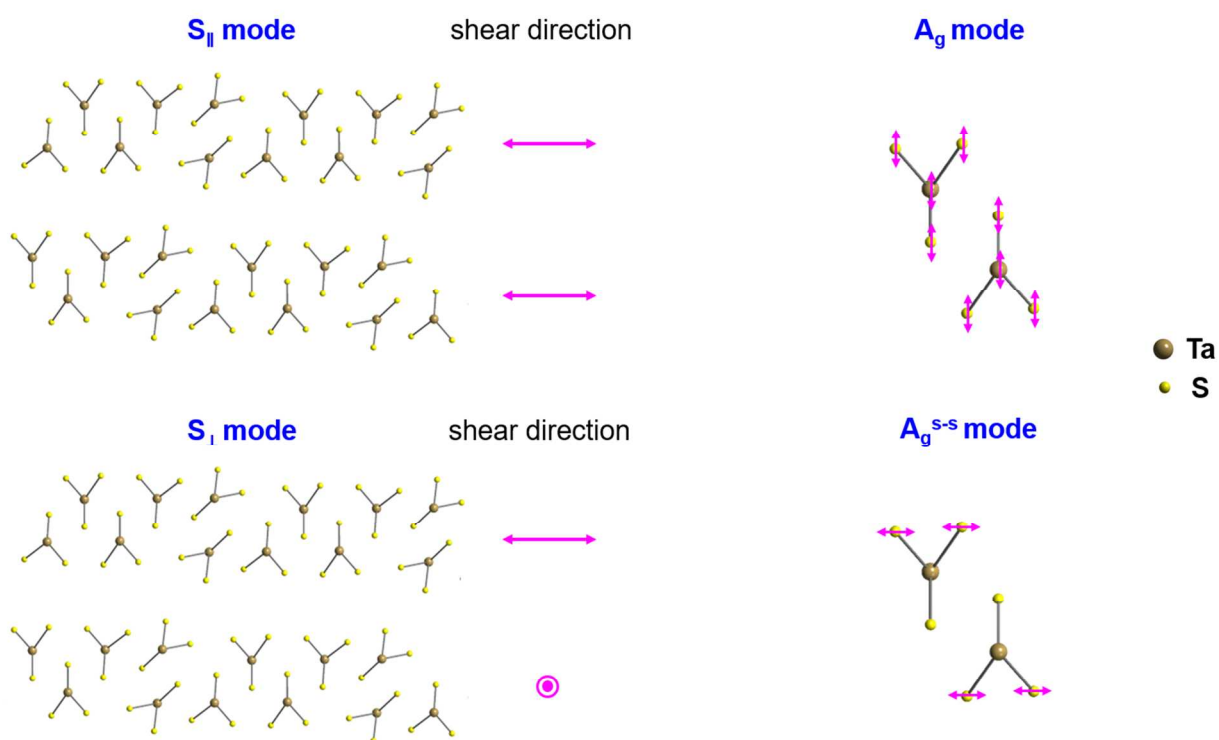

**Figure S3** Schematic diagram for S<sub>||</sub>, S<sub>⊥</sub>, A<sub>g</sub> and A<sub>g</sub><sup>s-s</sup> modes.

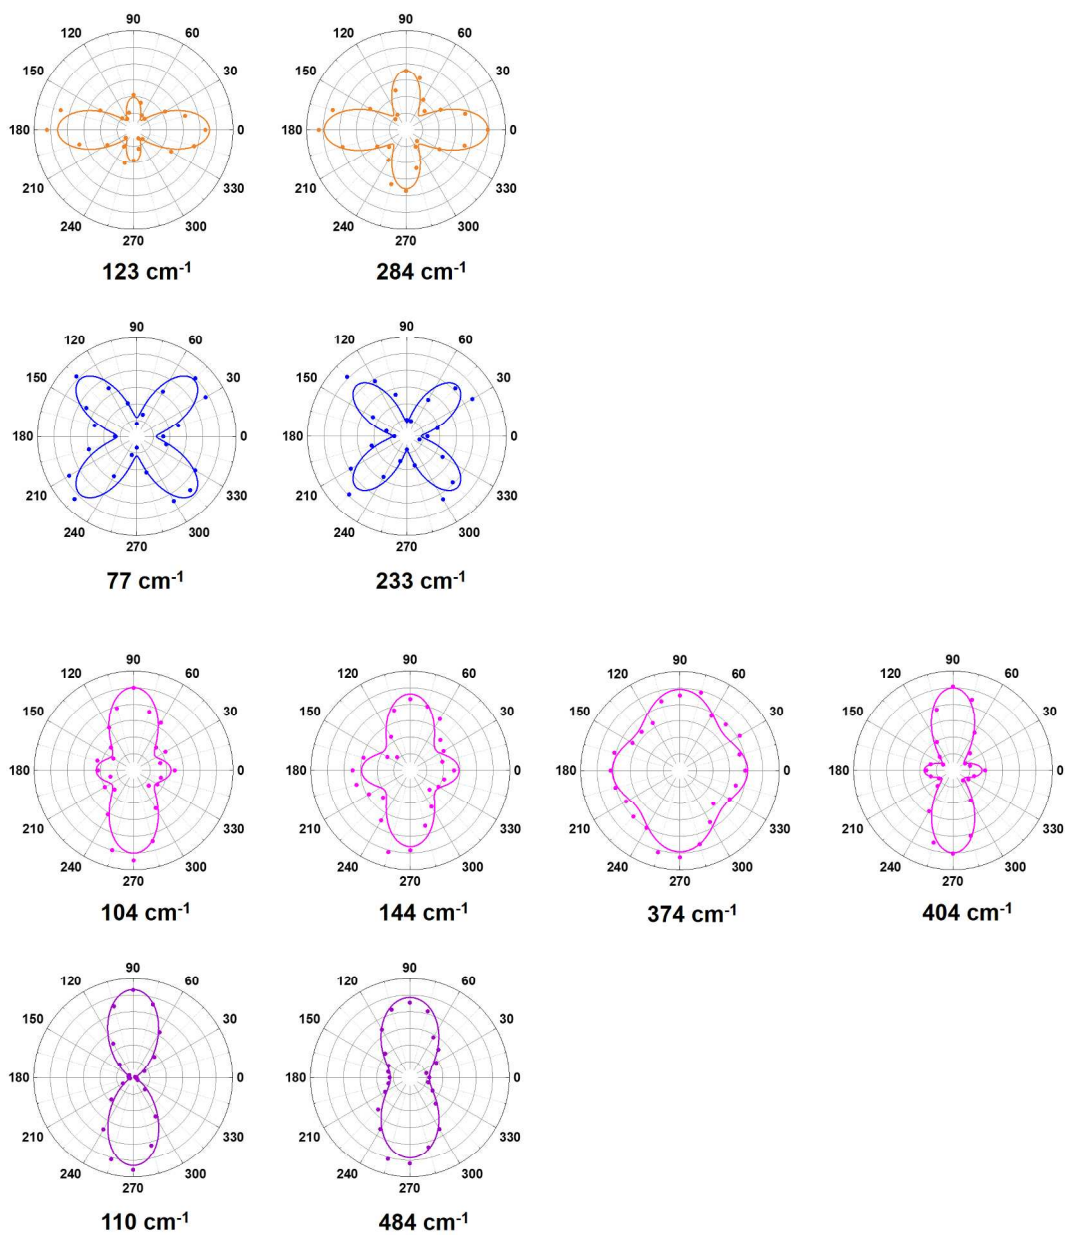

**Figure S4** Angle-resolved Raman spectroscopy (polar plots) for additional the Raman peaks of o-TaS<sub>3</sub> under excitation wavelength of  $\lambda = 532$  nm.

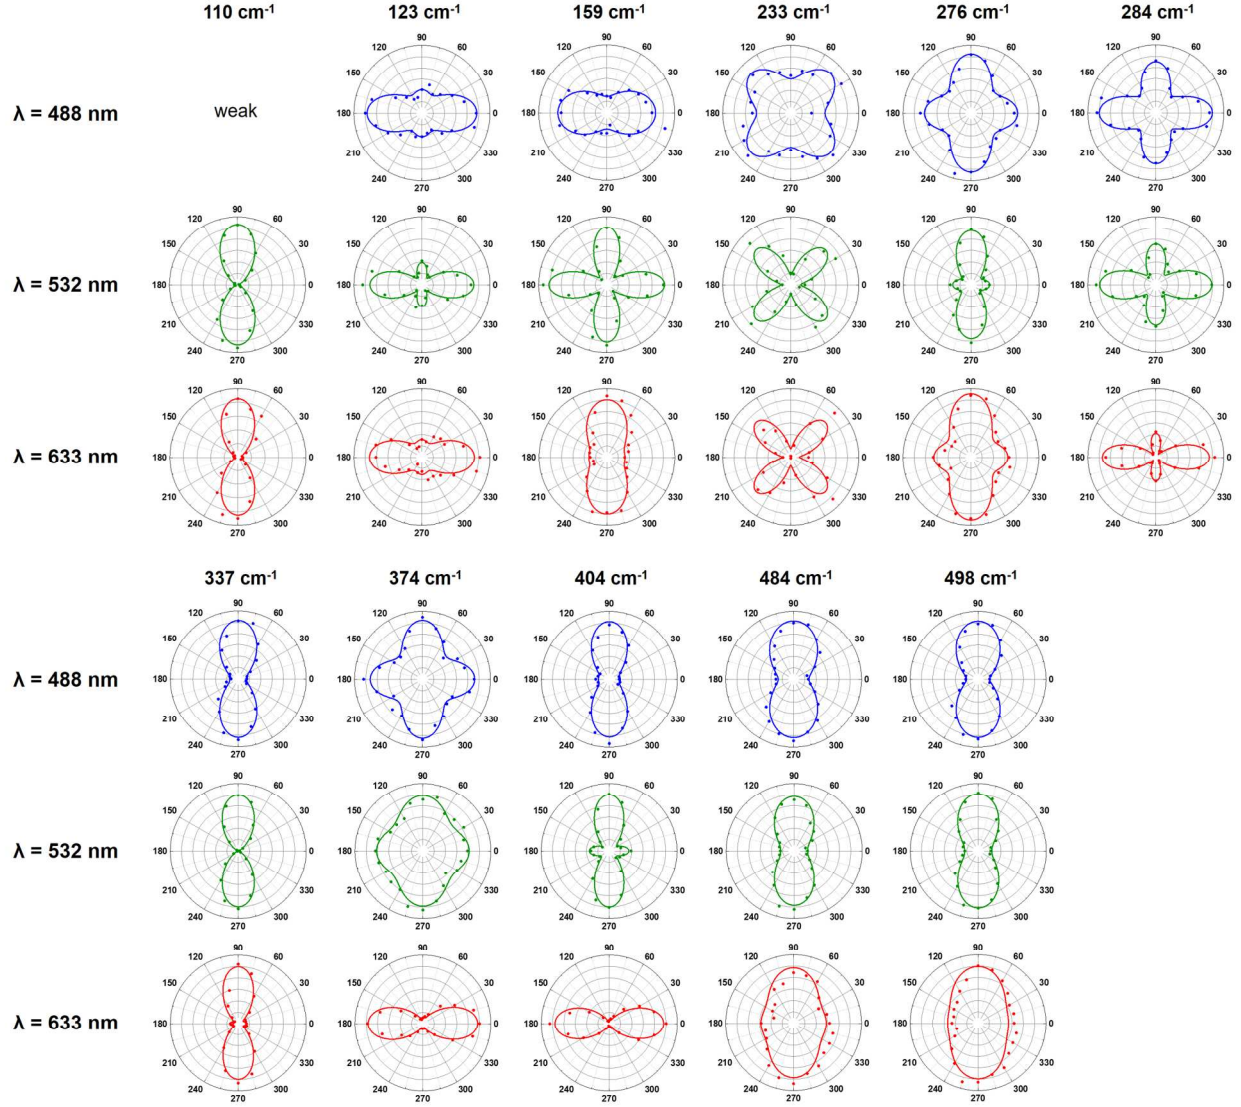

**Figure S5** Comparison between the angle-resolved Raman response (polar plots) of o-TaS<sub>3</sub> under three different excitation wavelengths:  $\lambda = 488$  nm, 532 nm, 633 nm, respectively.
